# Supplementary material for: Evaluation of Cooked Rice for Eating Quality and Its Components in Geng Rice
Source: MDPI journal article supplement (doi:10.3390/foods12173267), 2023-08-30
Supplement: s1 [file s1]

**Supplementary Tables:****Table S2** Correlation analysis between viscosity and parameters of color models  
CIEL\*a\*b\*and HSI (2020)

|            | L       | a*      | b*      | H      | S     | I    | Appearance |
|------------|---------|---------|---------|--------|-------|------|------------|
| L          | 1       |         |         |        |       |      |            |
| a*         | -0.27** | 1       |         |        |       |      |            |
| b*         | 0.09    | -0.11   | 1       |        |       |      |            |
| H          | -0.06   | -0.03   | -0.98** | 1      |       |      |            |
| S          | -0.08   | -0.35** | -0.59** | 0.62** | 1     |      |            |
| I          | 1.00**  | -0.25** | 0.04    | -0.01  | -0.06 | 1    |            |
| Appearance | 0.10    | 0.08    | 0.12    | -0.13  | -0.14 | 0.10 | 1          |

\*\* Indicates significance at  $P < 0.01$ .

**Table S3** Correlation analysis between viscosity and parameters of Texture Analyzer for cooked rice (2020)

|                  | TPA-<br>hardness | TPA-<br>adhesiveness | TPA-<br>springiness | TPA-<br>chewiness | TPA-<br>gumminess | TPA-<br>cohesiveness | TPA-<br>resilience | Viscosity |
|------------------|------------------|----------------------|---------------------|-------------------|-------------------|----------------------|--------------------|-----------|
| TPA-hardness     | 1                |                      |                     |                   |                   |                      |                    |           |
| TPA-adhesiveness | 0.22**           | 1                    |                     |                   |                   |                      |                    |           |
| TPA-springiness  | 0.15*            | 0.63**               | 1                   |                   |                   |                      |                    |           |
| TPA-chewiness    | 0.72**           | 0.55**               | 0.75**              | 1                 |                   |                      |                    |           |
| TPA-gumminess    | 0.93**           | 0.34**               | 0.37**              | 0.89**            | 1                 |                      |                    |           |
| TPA-cohesiveness | -0.02            | 0.41**               | 0.65**              | 0.57**            | 0.34**            | 1                    |                    |           |
| TPA-resilience   | 0.15*            | -0.03                | 0.16*               | 0.37**            | 0.39**            | 0.72**               | 1                  |           |
| Viscosity        | -0.02            | 0.42**               | 0.31**              | 0.23**            | 0.10              | 0.32**               | 0.15*              | 1         |

\* Indicates significance at  $P < 0.05$ ; \*\* Indicates significance at  $P < 0.01$ .

TPA: Parameters measured by the Texture Analyzer.

**Table S4** Correlation analysis between viscosity and parameters of Texture Analyzer for cooked rice (2021)

|                  | TPA-<br>hardness | TPA-<br>adhesiveness | TPA-<br>springiness | TPA-<br>chewiness | TPA-<br>gumminess | TPA-<br>cohesiveness | TPA-<br>resilience | Viscosity |
|------------------|------------------|----------------------|---------------------|-------------------|-------------------|----------------------|--------------------|-----------|
| TPA-hardness     | 1                |                      |                     |                   |                   |                      |                    |           |
| TPA-adhesiveness | -0.18*           | 1                    |                     |                   |                   |                      |                    |           |
| TPA-springiness  | 0.053            | 0.59**               | 1                   |                   |                   |                      |                    |           |
| TPA-chewiness    | 0.74**           | 0.09                 | 0.53**              | 1                 |                   |                      |                    |           |
| TPA-gumminess    | 0.84**           | -0.19**              | 0.15*               | 0.91**            | 1                 |                      |                    |           |
| TPA-cohesiveness | 0.02             | -0.09                | 0.31**              | 0.40**            | 0.30**            | 1                    |                    |           |
| TPA-resilience   | 0.31**           | -0.41**              | -0.01               | 0.48**            | 0.56**            | 0.82**               | 1                  |           |
| Viscosity        | -0.28**          | 0.58**               | 0.25**              | -0.16*            | -0.32**           | -0.09                | -0.31*             | 1         |

\* Indicates significance at  $P < 0.05$ ; \*\* Indicate significance at  $P < 0.01$ .

TPA: Parameters measured by the Texture Analyzer.
